# Supplementary material for: Observed snow depth trends in the European Alps: 1971 to 2019
Source: Copernicus journal article supplement (doi:10.5194/tc-15-1343-2021), 2021-03-18
Supplement: Supplementary file 1 [file tc-15-1343-2021-supplement.pdf]

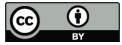

*Supplement of*

## **Observed snow depth trends in the European Alps: 1971 to 2019**

**Michael Matiu et al.**

*Correspondence to:* Michael Matiu ([michael.matiu@eurac.edu](mailto:michael.matiu@eurac.edu))

The copyright of individual parts of the supplement might differ from the article licence.

## Figures

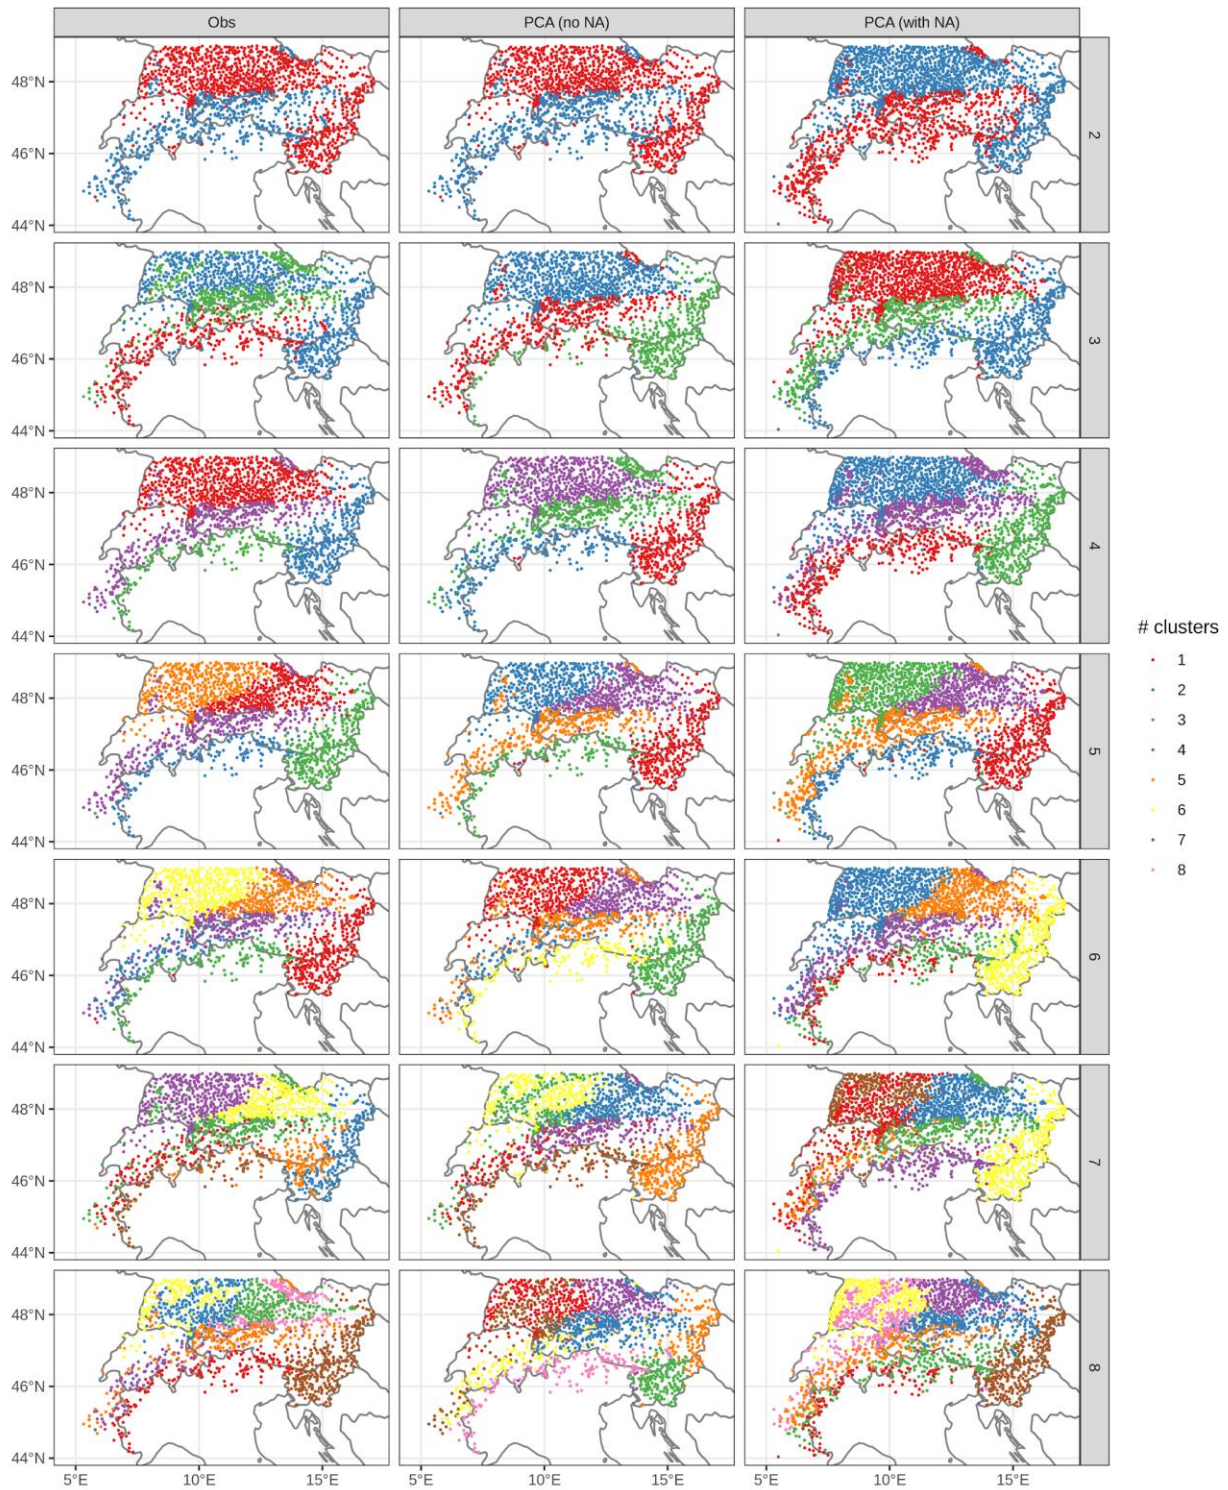

**Figure S1: Results of k-means clustering. Rows show the number of clusters (order is arbitrary, so colors might not match within a row). Columns identify the input matrix for the clustering algorithm: For Obs scaled daily observations of snow depth were used and for PCA the PCA matrix. The two PCA columns stand for the standard PCA that does not allow**

missing values (no NA), which corresponds to the same station set as in Obs, and the second PCA column is for the modified PCA algorithm that allows missing values (with NA) and has a higher station coverage.

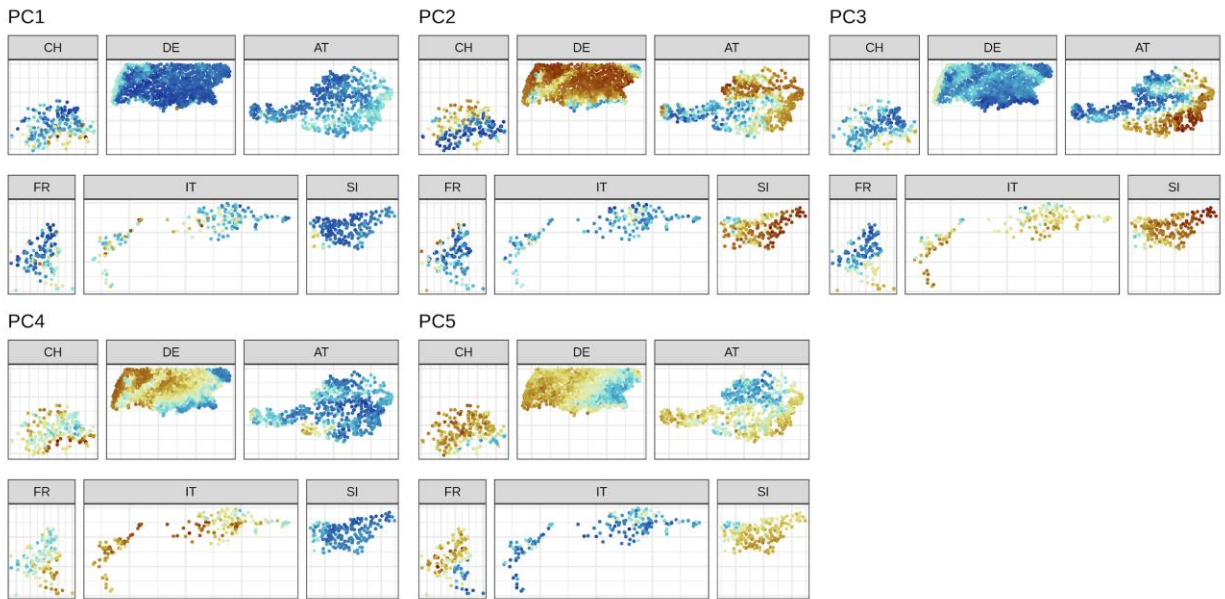

Figure S2: PC loadings from Fig. 3 divided by country showing clearer that gradients are not driven by national borders.

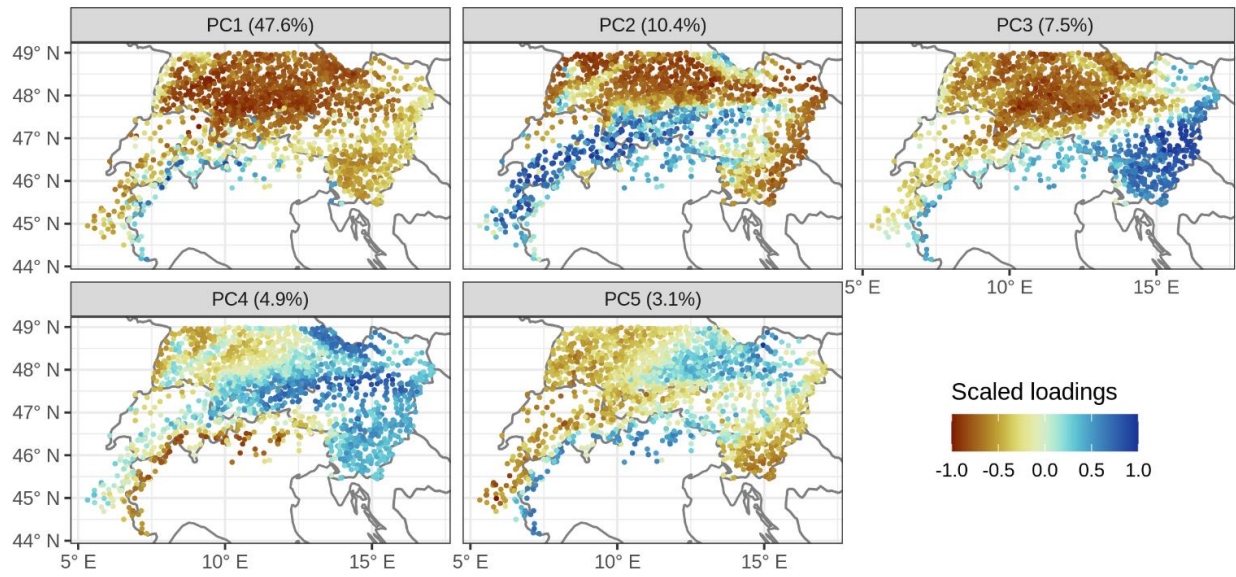

**Figure S3:** Same as Fig. 3 but using a standard principal component analysis (PCA) and only stations which had complete data. Main modes of variability in daily snow depth series. The plots show scaled loadings for the first five principal components (PCs). The title in each panel contains the amount of variance explained by the respective PC. The principal component analysis was applied on daily snow depth data from December to April for the hydrological years from 1981 to 2010, for stations that had no missing observations.



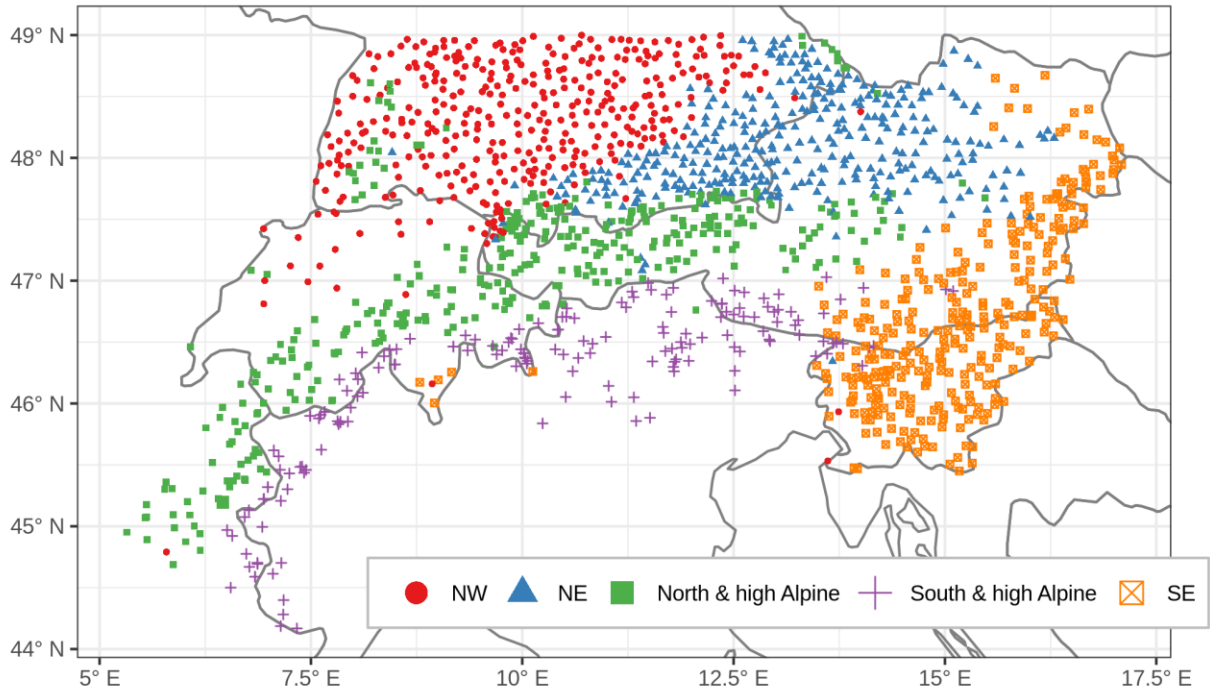

**Figure S4:** Same as Fig. 5, but based on the PCA from Fig. S3, which is for stations with no missing observations. Clustering of stations based on daily snow depth data. Map of regions from k-means clustering on the first five principal components.

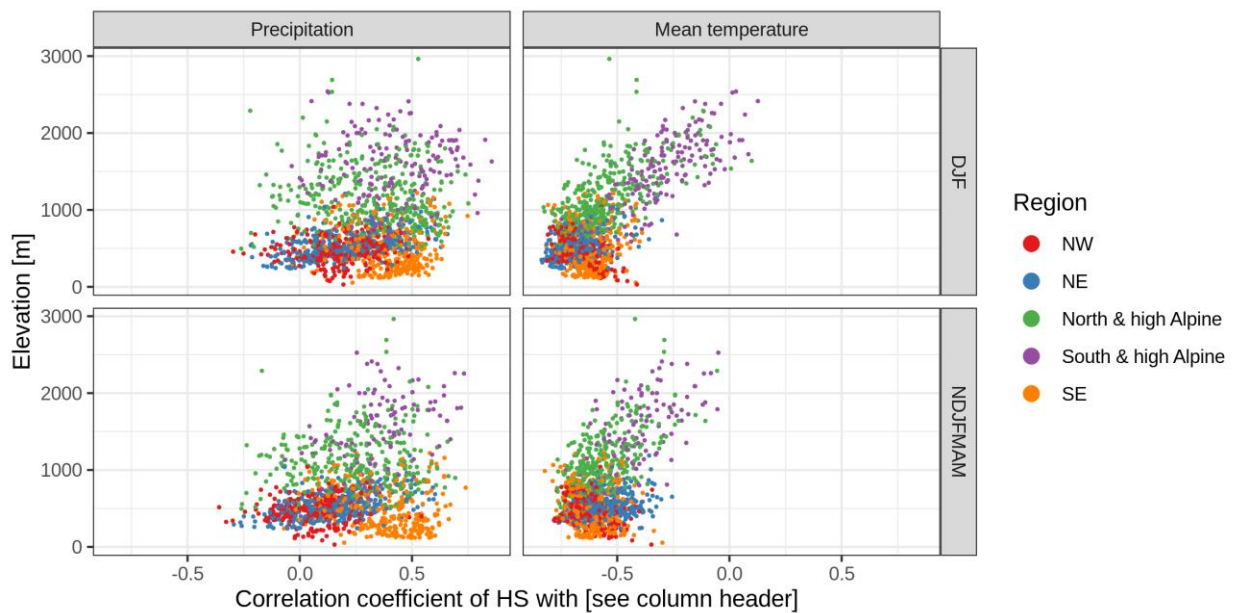

**Figure S5:** Correlation of station snow depth (HS) with precipitation and temperature extracted from gridded products. Each point shows the Pearson correlation coefficient of seasonal HS with the seasonal sum of precipitation (left column) and with the seasonal mean temperature (right column) for one station. The top row shows the season December to February (DJF), and the bottom row the season November to May (NDJFMAM). The temperature values used in the correlations are extracted from the reanalysis MESCAN-SURFEX.

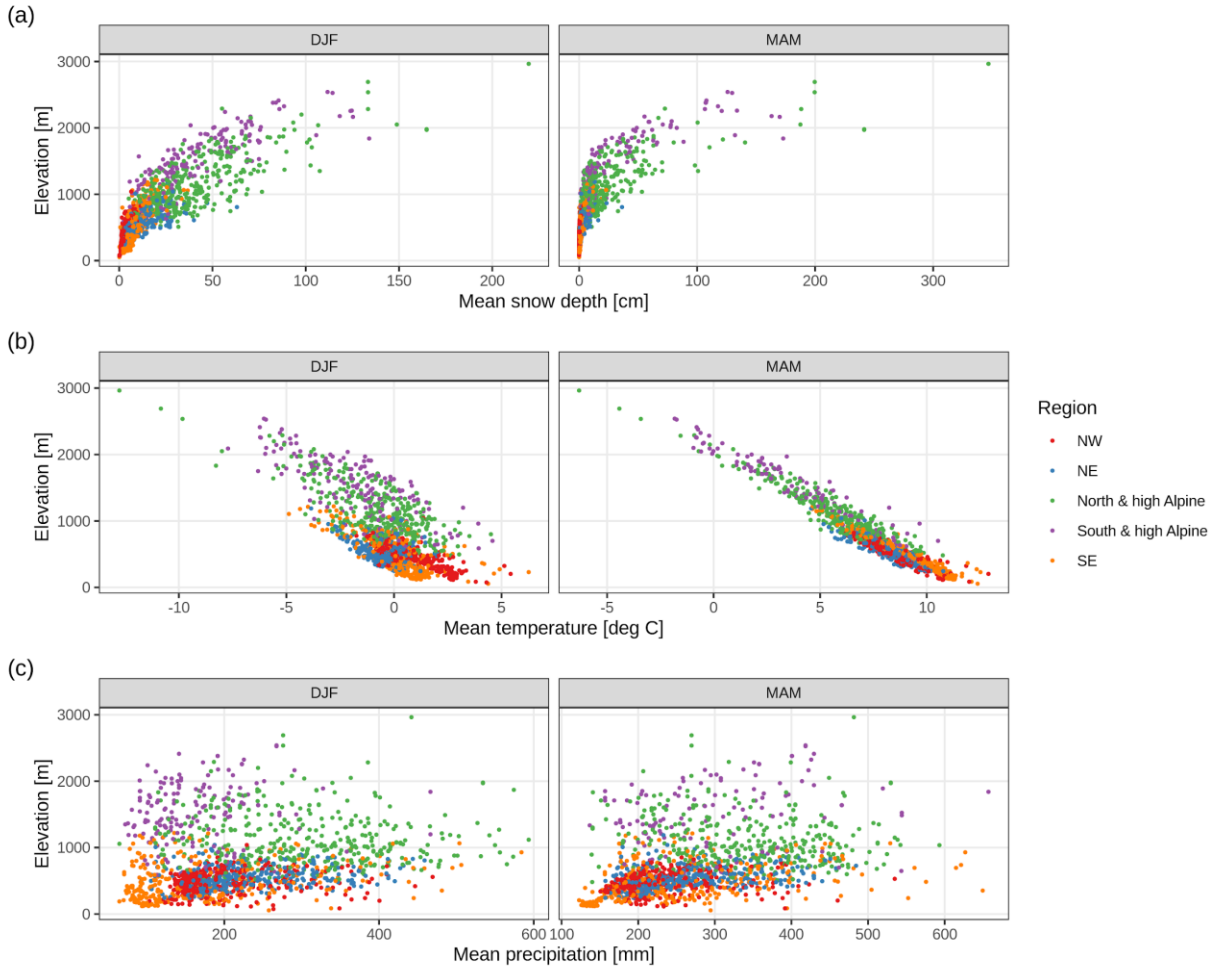

**Figure S6:** Same as Fig. 6 but using observation based spatial analysis data for temperature and precipitation and the period 1981–2008. Instead of MESCAN-SURFEX reanalysis, here the temperature and precipitation values were extracted from E-OBS and EURO4M-APGD, and the period slightly shortened from 1981–2010 to 1981–2008, because of the shorter availability of EURO4M-APGD.

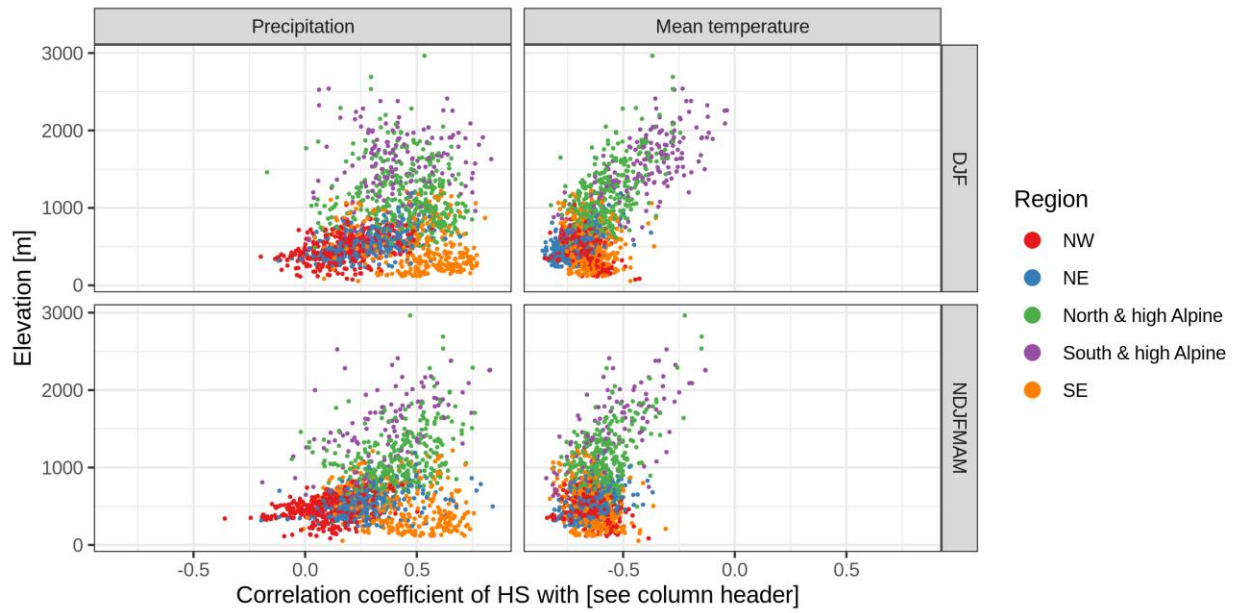

**Figure S7:** Same as Fig. S5 but using observation based spatial analysis data for temperature and precipitation and the period 1981–2008. Instead of MESCAN-SURFEX reanalysis, here the temperature and precipitation values were extracted from E-OBS and EURO4M-APGD

## Tables

**Table S1: Climatology of snow depth (HS), air temperature and precipitation for the period 1981–2010 for winter (December to February). The temperature and precipitation values were extracted from MESCAN–SURFEX reanalysis, while the snow depths are based on station data. See also Fig. 6.**

| Elevation   | Region              | HS [cm] | Temperature [deg C] | Precipitation [mm] | Number |
|-------------|---------------------|---------|---------------------|--------------------|--------|
| (0,250]     | NW                  | 1.0     | 2.7                 | 202                | 27     |
|             | NE                  | 3.3     | -0.2                | 135                | 5      |
|             | SE                  | 3.5     | 0.8                 | 145                | 73     |
| (250,500]   | NW                  | 2.6     | 0.5                 | 175                | 165    |
|             | NE                  | 5.7     | -0.3                | 184                | 148    |
|             | North & high Alpine | 4.3     | 1.5                 | 249                | 2      |
|             | SE                  | 6.0     | 0.3                 | 166                | 111    |
| (500,750]   | NW                  | 4.8     | 0.0                 | 189                | 123    |
|             | NE                  | 11.9    | -0.7                | 220                | 142    |
|             | North & high Alpine | 20.8    | 0.3                 | 284                | 48     |
|             | South & high Alpine | 14.9    | 0.6                 | 188                | 12     |
|             | SE                  | 9.1     | -0.2                | 207                | 69     |
| (750,1000]  | NW                  | 8.0     | -0.5                | 199                | 9      |
|             | NE                  | 19.9    | -1.6                | 229                | 31     |
|             | North & high Alpine | 26.7    | -0.4                | 288                | 108    |
|             | South & high Alpine | 22.5    | -0.5                | 215                | 16     |
|             | SE                  | 14.3    | -1.5                | 208                | 44     |
| (1000,1250] | NW                  | 7.4     | 0.1                 | 194                | 1      |
|             | NE                  | 21.3    | -1.9                | 169                | 3      |
|             | North & high Alpine | 35.4    | -0.9                | 309                | 84     |
|             | South & high Alpine | 22.5    | -1.4                | 176                | 21     |
|             | SE                  | 20.1    | -3.4                | 189                | 16     |
| (1250,1500] | North & high Alpine | 48.9    | -2.4                | 284                | 66     |
|             | South & high Alpine | 34.6    | -2.3                | 168                | 36     |
| (1500,1750] | North & high Alpine | 56.8    | -3.9                | 287                | 35     |
|             | South & high Alpine | 47.0    | -3.3                | 177                | 34     |
| (1750,2000] | North & high Alpine | 81.1    | -5.5                | 279                | 21     |
|             | South & high Alpine | 65.5    | -4.2                | 191                | 33     |
| (2000,2250] | North & high Alpine | 103.6   | -6.7                | 290                | 5      |
|             | South & high Alpine | 77.2    | -6.4                | 165                | 13     |
| (2250,2500] | North & high Alpine | 58.0    | -9.3                | 270                | 1      |
|             | South & high Alpine | 95.5    | -7.0                | 235                | 8      |
| (2500,2750] | North & high Alpine | 133.8   | -9.8                | 237                | 2      |
|             | South & high Alpine | 117.5   | -10.5               | 360                | 2      |
| (2750,3000] | North & high Alpine | 218.0   | -13.0               | 343                | 1      |



**Table S2: Same as Table S1 but for spring (March to May).**

| Elevation   | Region              | HS [cm] | Temperature [deg C] | Precipitation [mm] | Number |
|-------------|---------------------|---------|---------------------|--------------------|--------|
| (0,250]     | NW                  | 0.1     | 10.3                | 251                | 25     |
|             | NE                  | 0.4     | 9.3                 | 177                | 5      |
|             | SE                  | 0.4     | 10.5                | 203                | 72     |
| (250,500]   | NW                  | 0.4     | 8.7                 | 214                | 156    |
|             | NE                  | 1.1     | 8.8                 | 226                | 147    |
|             | North & high Alpine | 0.4     | 9.6                 | 251                | 2      |
|             | SE                  | 1.1     | 9.7                 | 253                | 111    |
| (500,750]   | NW                  | 1.0     | 7.8                 | 241                | 117    |
|             | NE                  | 3.4     | 7.9                 | 276                | 143    |
|             | North & high Alpine | 6.8     | 8.0                 | 342                | 49     |
|             | South & high Alpine | 3.9     | 8.8                 | 329                | 8      |
|             | SE                  | 2.2     | 8.3                 | 302                | 71     |
| (750,1000]  | NW                  | 2.1     | 6.5                 | 260                | 10     |
|             | NE                  | 7.4     | 6.7                 | 292                | 30     |
|             | North & high Alpine | 11.2    | 6.9                 | 339                | 101    |
|             | South & high Alpine | 9.6     | 7.1                 | 371                | 13     |
|             | SE                  | 4.9     | 6.9                 | 320                | 44     |
| (1000,1250] | NW                  | 1.7     | 7.1                 | 239                | 1      |
|             | NE                  | 8.0     | 5.7                 | 289                | 3      |
|             | North & high Alpine | 16.8    | 5.9                 | 385                | 81     |
|             | South & high Alpine | 5.7     | 6.0                 | 321                | 16     |
|             | SE                  | 8.1     | 5.3                 | 338                | 18     |
| (1250,1500] | North & high Alpine | 32.0    | 4.5                 | 343                | 57     |
|             | South & high Alpine | 14.5    | 4.7                 | 340                | 26     |
| (1500,1750] | North & high Alpine | 38.6    | 2.8                 | 333                | 26     |
|             | South & high Alpine | 27.9    | 3.3                 | 315                | 18     |
| (1750,2000] | North & high Alpine | 93.7    | 1.5                 | 335                | 13     |
|             | South & high Alpine | 60.6    | 2.5                 | 372                | 24     |
| (2000,2250] | North & high Alpine | 118.1   | -0.1                | 318                | 3      |
|             | South & high Alpine | 94.0    | 0.6                 | 392                | 9      |
| (2250,2500] | North & high Alpine | 73.1    | -1.3                | 376                | 1      |
|             | South & high Alpine | 119.8   | -0.2                | 459                | 7      |
| (2500,2750] | North & high Alpine | 198.7   | -3.5                | 295                | 2      |
|             | South & high Alpine | 131.9   | -3.6                | 336                | 2      |
| (2750,3000] | North & high Alpine | 345.8   | -6.4                | 407                | 1      |

**Table S3: Same as Table S1 but using observation based spatial analysis data for temperature and precipitation and the period 1981–2008. Instead of MESCAN-SURFEX reanalysis, here the temperature and precipitation values were extracted from E-OBS and EURO4M-APGD, and the period slightly shortened from 1981–2010 to 1981–2008, because of the shorter availability of EURO4M-APGD.**

| Elevation   | Region              | HS [cm] | Temperature [deg C] | Precipitation [mm] | Number |
|-------------|---------------------|---------|---------------------|--------------------|--------|
| (0,250]     | NW                  | 1.0     | 2.8                 | 194                | 37     |
|             | NE                  | 3.1     | 0.4                 | 152                | 5      |
|             | SE                  | 3.5     | 1.2                 | 139                | 73     |
| (250,500]   | NW                  | 2.5     | 0.8                 | 189                | 192    |
|             | NE                  | 5.6     | -0.2                | 208                | 153    |
|             | North & high Alpine | 4.3     | 2.8                 | 196                | 2      |
|             | SE                  | 5.9     | 0.5                 | 169                | 109    |
| (500,750]   | NW                  | 4.8     | -0.1                | 204                | 157    |
|             | NE                  | 11.8    | -0.5                | 246                | 149    |
|             | North & high Alpine | 21.0    | 0.6                 | 311                | 50     |
|             | South & high Alpine | 14.7    | 1.7                 | 189                | 11     |
|             | SE                  | 8.9     | 0.0                 | 212                | 69     |
| (750,1000]  | NW                  | 7.6     | -1.0                | 208                | 10     |
|             | NE                  | 19.4    | -1.2                | 268                | 34     |
|             | North & high Alpine | 26.3    | -0.1                | 313                | 116    |
|             | South & high Alpine | 20.0    | 0.6                 | 193                | 15     |
|             | SE                  | 13.9    | -1.4                | 218                | 44     |
| (1000,1250] | NW                  | 6.4     | 1.4                 | 229                | 1      |
|             | NE                  | 21.1    | -1.2                | 141                | 3      |
|             | North & high Alpine | 35.0    | -0.3                | 315                | 84     |
|             | South & high Alpine | 20.2    | -0.6                | 145                | 21     |
|             | SE                  | 19.6    | -2.8                | 187                | 16     |
| (1250,1500] | North & high Alpine | 47.6    | -1.1                | 296                | 64     |
|             | South & high Alpine | 31.6    | -0.9                | 146                | 37     |
| (1500,1750] | North & high Alpine | 56.3    | -2.2                | 242                | 34     |
|             | South & high Alpine | 43.5    | -1.8                | 159                | 32     |
| (1750,2000] | North & high Alpine | 80.7    | -3.9                | 311                | 21     |
|             | South & high Alpine | 62.1    | -2.8                | 177                | 31     |
| (2000,2250] | North & high Alpine | 103.4   | -5.3                | 276                | 5      |
|             | South & high Alpine | 72.6    | -5.1                | 159                | 13     |
| (2250,2500] | North & high Alpine | 94.3    | -5.5                | 286                | 2      |
|             | South & high Alpine | 96.4    | -5.6                | 195                | 7      |
| (2500,2750] | North & high Alpine | 133.4   | -10.3               | 276                | 2      |
|             | South & high Alpine | 113.0   | -6.0                | 268                | 2      |
| (2750,3000] | North & high Alpine | 219.5   | -12.8               | 442                | 1      |

**Table S4: Same as Table S3 but for spring (March to May).**

| Elevation   | Region              | HS [cm] | Temperature [deg C] | Precipitation [mm] | Number |
|-------------|---------------------|---------|---------------------|--------------------|--------|
| (0,250]     | NW                  | 0.1     | 10.7                | 236                | 32     |
|             | NE                  | 0.4     | 10.2                | 186                | 5      |
|             | SE                  | 0.4     | 11.0                | 198                | 72     |
| (250,500]   | NW                  | 0.4     | 9.1                 | 223                | 176    |
|             | NE                  | 1.1     | 9.1                 | 236                | 153    |
|             | North & high Alpine | 0.4     | 10.1                | 194                | 2      |
|             | SE                  | 1.1     | 9.9                 | 252                | 110    |
| (500,750]   | NW                  | 1.0     | 7.9                 | 246                | 149    |
|             | NE                  | 3.3     | 8.0                 | 292                | 150    |
|             | North & high Alpine | 6.7     | 8.2                 | 343                | 49     |
|             | South & high Alpine | 4.1     | 8.8                 | 325                | 8      |
|             | SE                  | 2.3     | 8.4                 | 298                | 70     |
| (750,1000]  | NW                  | 2.1     | 6.7                 | 263                | 10     |
|             | NE                  | 6.9     | 6.7                 | 318                | 33     |
|             | North & high Alpine | 10.6    | 6.9                 | 345                | 107    |
|             | South & high Alpine | 8.9     | 7.7                 | 326                | 12     |
|             | SE                  | 5.1     | 6.8                 | 311                | 43     |
| (1000,1250] | NE                  | 7.9     | 5.9                 | 217                | 3      |
|             | North & high Alpine | 16.8    | 5.9                 | 349                | 79     |
|             | South & high Alpine | 5.5     | 6.1                 | 239                | 14     |
|             | SE                  | 9.0     | 5.3                 | 290                | 15     |
| (1250,1500] | North & high Alpine | 31.8    | 4.5                 | 330                | 57     |
|             | South & high Alpine | 13.8    | 4.7                 | 254                | 27     |
| (1500,1750] | North & high Alpine | 38.7    | 3.0                 | 276                | 25     |
|             | South & high Alpine | 30.0    | 3.1                 | 302                | 18     |
| (1750,2000] | North & high Alpine | 94.2    | 1.5                 | 339                | 13     |
|             | South & high Alpine | 59.2    | 2.1                 | 324                | 21     |
| (2000,2250] | North & high Alpine | 118.4   | 0.0                 | 308                | 3      |
|             | South & high Alpine | 90.1    | -0.2                | 319                | 9      |
| (2250,2500] | North & high Alpine | 130.5   | -1.2                | 359                | 2      |
|             | South & high Alpine | 114.5   | -0.7                | 389                | 7      |
| (2500,2750] | North & high Alpine | 199.6   | -3.9                | 270                | 2      |
|             | South & high Alpine | 127.7   | -1.8                | 418                | 2      |
| (2750,3000] | North & high Alpine | 346.9   | -6.3                | 482                | 1      |







### Sensitivity of trend modelling: OLS instead of GLS

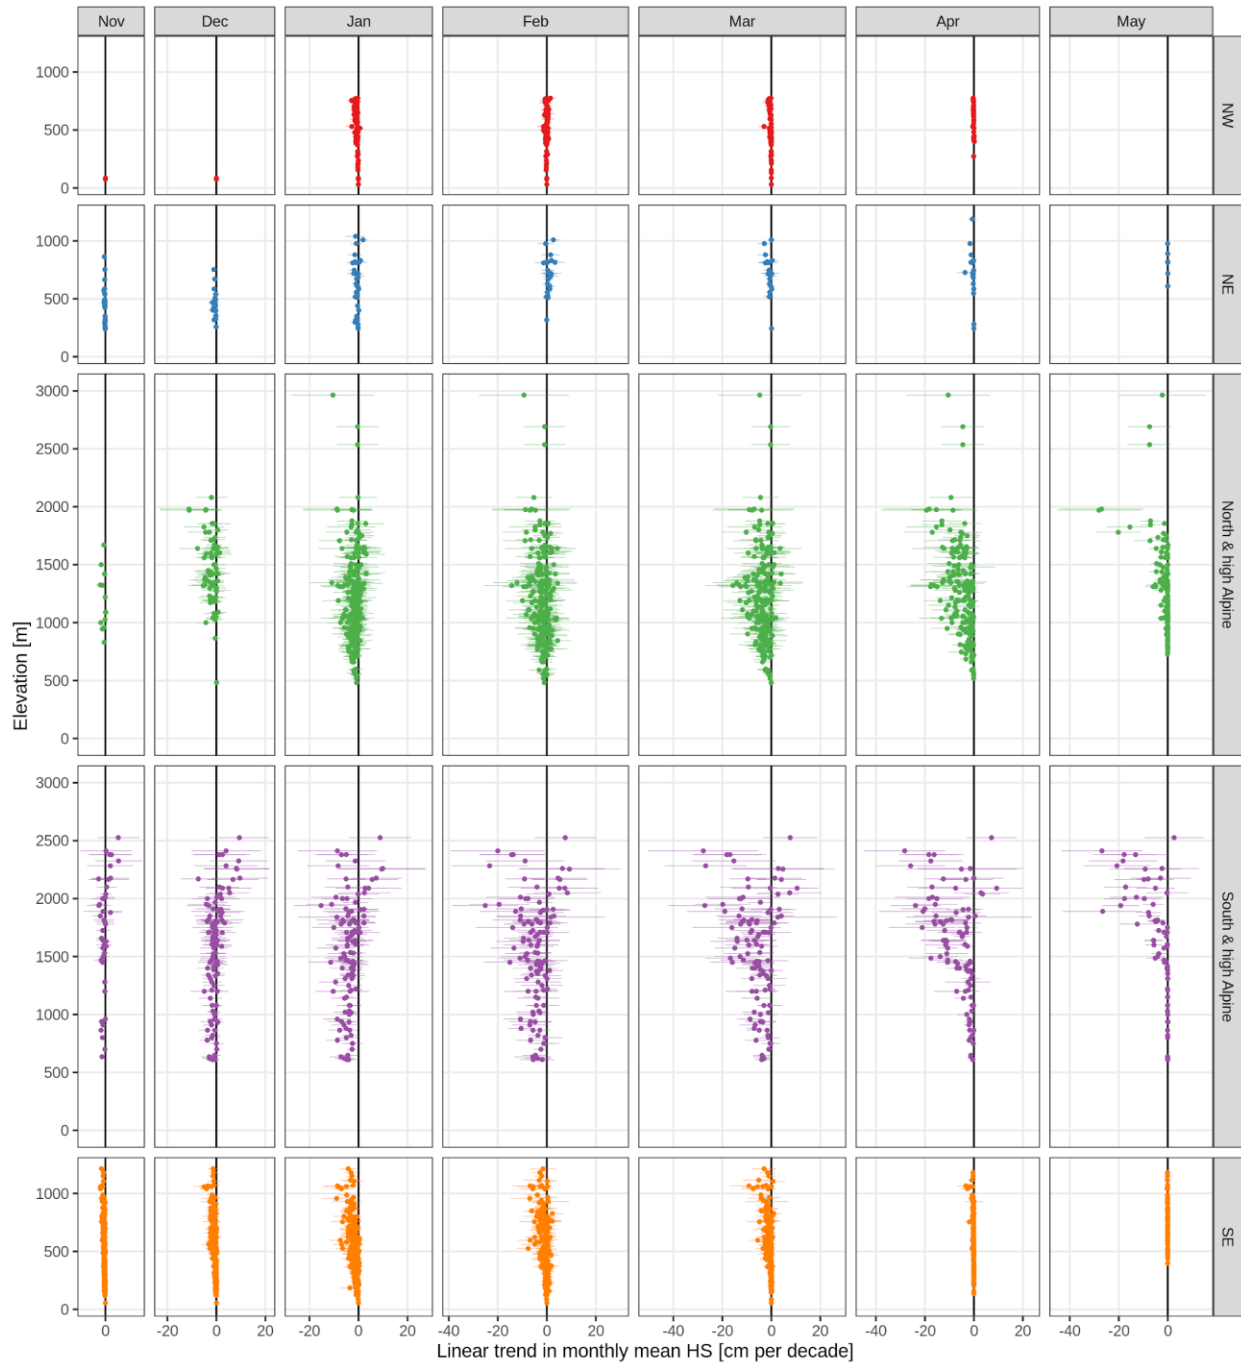

Figure S8: Same as Fig. 6, but using an OLS model instead of GLS.

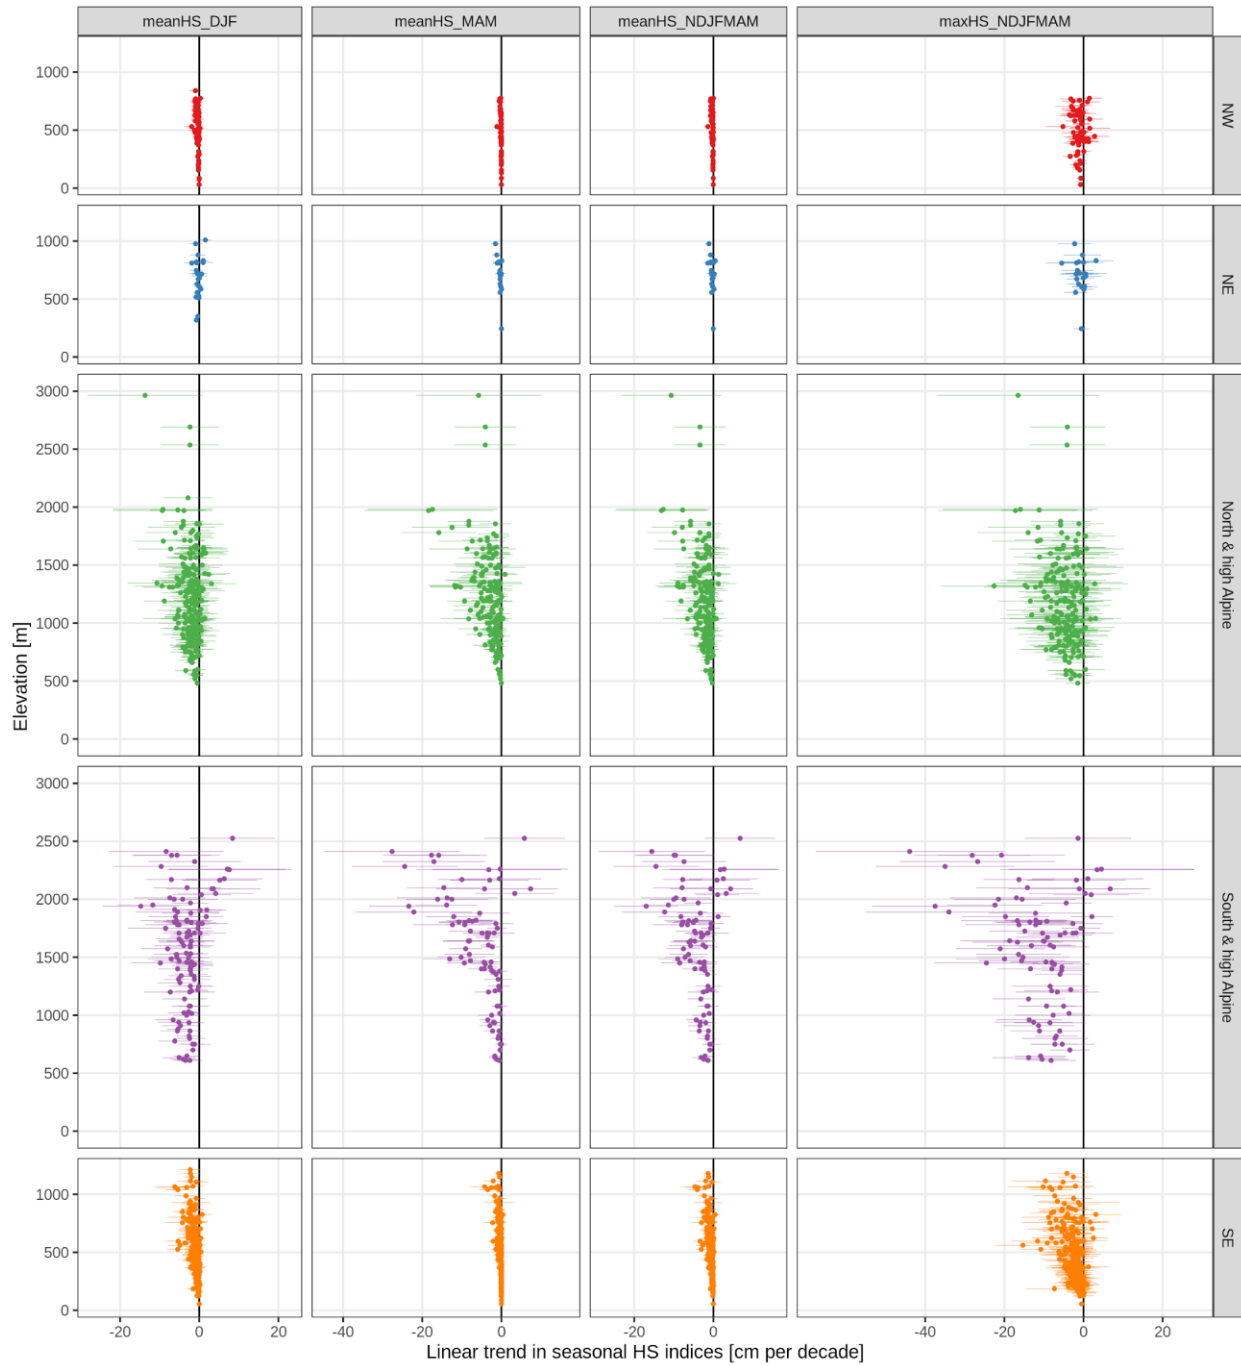

**Figure S9:** Same as Fig. C1, but using an OLS model instead of GLS.

**Table S8: Same as Table 2, but using an OLS model instead of GLS.**

| Month | Region | Elevation: (0,1000] m |       |       |      | Elevation: (1000,2000] m |       |       |        | Elevation: (2000,3000] m |        |       |      |
|-------|--------|-----------------------|-------|-------|------|--------------------------|-------|-------|--------|--------------------------|--------|-------|------|
|       |        | #                     | mean  | sig-  | sig+ | #                        | mean  | sig-  | sig+   | #                        | mean   | sig-  | sig+ |
| Nov   | NW     | 2                     | -0.01 | 50.0% |      |                          |       |       |        |                          |        |       |      |
|       | NE     | 34                    | -0.25 | 8.8%  |      |                          |       |       |        |                          |        |       |      |
|       | N&hA   | 4                     | -1.05 | 25.0% |      | 9                        | -0.67 | 22.2% |        |                          |        |       |      |
|       | S&hA   | 7                     | -1.03 | 57.1% |      | 23                       | -0.80 |       |        | 12                       | 1.52   |       |      |
|       | SE     | 218                   | -0.45 | 11.9% |      | 8                        | -1.34 | 50.0% |        |                          |        |       |      |
| Dec   | NW     | 2                     | -0.00 |       |      |                          |       |       |        |                          |        |       |      |
|       | NE     | 24                    | -0.62 | 8.3%  |      |                          |       |       |        |                          |        |       |      |
|       | N&hA   | 3                     | -1.54 | 33.3% |      | 67                       | -2.06 | 4.5%  |        | 1                        | -2.02  |       |      |
|       | S&hA   | 17                    | -1.47 | 11.8% |      | 67                       | -0.85 | 1.5%  |        | 17                       | 4.21   |       |      |
|       | SE     | 221                   | -0.61 | 7.7%  |      | 9                        | -2.27 | 22.2% |        |                          |        |       |      |
| Jan   | NW     | 81                    | -0.72 | 27.2% |      |                          |       |       |        |                          |        |       |      |
|       | NE     | 32                    | -0.70 |       |      | 2                        | 0.32  |       |        |                          |        |       |      |
|       | N&hA   | 83                    | -1.98 | 9.6%  |      | 154                      | -1.72 | 5.2%  |        | 4                        | -2.83  |       |      |
|       | S&hA   | 19                    | -5.03 | 73.7% |      | 76                       | -3.91 | 22.4% |        | 17                       | 0.08   |       |      |
|       | SE     | 243                   | -1.66 | 32.1% |      | 10                       | -4.58 | 70.0% |        |                          |        |       |      |
| Feb   | NW     | 78                    | -0.07 |       |      |                          |       |       |        |                          |        |       |      |
|       | NE     | 24                    | 0.77  |       | 4.2% | 1                        | 2.67  |       | 100.0% |                          |        |       |      |
|       | N&hA   | 84                    | -1.35 | 3.6%  |      | 153                      | -2.30 | 9.2%  |        | 4                        | -4.09  |       |      |
|       | S&hA   | 19                    | -4.76 | 15.8% |      | 78                       | -5.09 | 16.7% |        | 17                       | -2.91  | 23.5% |      |
|       | SE     | 228                   | -0.66 | 4.8%  |      | 12                       | -2.73 | 8.3%  |        |                          |        |       |      |
| Mar   | NW     | 65                    | -0.30 | 1.5%  |      |                          |       |       |        |                          |        |       |      |
|       | NE     | 20                    | -0.90 |       |      | 1                        | -0.01 |       |        |                          |        |       |      |
|       | N&hA   | 75                    | -2.82 | 21.3% |      | 151                      | -3.94 | 21.2% |        | 4                        | -2.44  |       |      |
|       | S&hA   | 18                    | -3.68 | 38.9% |      | 73                       | -6.90 | 41.1% |        | 17                       | -5.55  | 29.4% | 5.9% |
|       | SE     | 212                   | -0.61 | 3.8%  |      | 12                       | -3.25 | 16.7% |        |                          |        |       |      |
| Apr   | NW     | 34                    | -0.11 | 52.9% |      |                          |       |       |        |                          |        |       |      |
|       | NE     | 18                    | -0.61 | 66.7% |      | 1                        | -0.64 |       |        |                          |        |       |      |
|       | N&hA   | 69                    | -2.02 | 85.5% |      | 133                      | -5.93 | 61.7% |        | 4                        | -7.22  | 25.0% |      |
|       | S&hA   | 14                    | -1.34 | 50.0% |      | 65                       | -7.85 | 69.2% |        | 17                       | -8.66  | 47.1% |      |
|       | SE     | 136                   | -0.15 | 10.3% |      | 7                        | -1.39 | 14.3% |        |                          |        |       |      |
| May   | NE     | 7                     | -0.02 |       |      |                          |       |       |        |                          |        |       |      |
|       | N&hA   | 36                    | -0.09 | 11.1% |      | 114                      | -1.81 | 43.9% |        | 3                        | -5.70  |       |      |
|       | S&hA   | 9                     | -0.04 |       |      | 41                       | -4.17 | 58.5% |        | 15                       | -10.80 | 46.7% |      |
|       | SE     | 52                    | -0.06 |       |      | 7                        | -0.14 | 14.3% |        |                          |        |       |      |

**Table S9: Same as Table C1, but using an OLS model instead of GLS.**

| Index          | Region | Elevation: (0,1000] m |       |       |      | Elevation: (1000,2000] m |       |      |      | Elevation: (2000,3000] m |       |      |      |
|----------------|--------|-----------------------|-------|-------|------|--------------------------|-------|------|------|--------------------------|-------|------|------|
|                |        | #                     | mean  | sig-  | sig+ | #                        | mean  | sig- | sig+ | #                        | mean  | sig- | sig+ |
| meanHS_DJF     | NW     | 78                    | -0.39 | 21.8% |      |                          |       |      |      |                          |       |      |      |
|                | NE     | 25                    | -0.27 | 8.0%  | 1    | 1.55                     |       |      |      |                          |       |      |      |
|                | N&hA   | 87                    | -1.77 | 14.9% | 154  | -2.23                    | 7.8%  |      | 4    | -5.30                    |       |      |      |
|                | S&hA   | 19                    | -3.65 | 36.8% | 74   | -3.53                    | 17.6% |      | 17   | -0.19                    | 5.9%  |      |      |
|                | SE     | 222                   | -0.97 | 19.4% | 10   | -3.18                    | 50.0% |      |      |                          |       |      |      |
| meanHS_MAM     | NW     | 62                    | -0.12 | 6.5%  |      |                          |       |      |      |                          |       |      |      |
|                | NE     | 18                    | -0.46 | 5.6%  |      |                          |       |      |      |                          |       |      |      |
|                | N&hA   | 61                    | -1.53 | 44.3% | 122  | -3.82                    | 45.1% |      | 3    | -4.64                    |       |      |      |
|                | S&hA   | 16                    | -1.42 | 37.5% | 52   | -6.27                    | 69.2% |      | 16   | -8.48                    | 50.0% | 6.2% |      |
|                | SE     | 209                   | -0.23 | 4.3%  | 9    | -1.80                    | 22.2% |      |      |                          |       |      |      |
| meanHS_NDJFMAM | NW     | 65                    | -0.23 | 32.3% |      |                          |       |      |      |                          |       |      |      |
|                | NE     | 21                    | -0.33 | 9.5%  |      |                          |       |      |      |                          |       |      |      |
|                | N&hA   | 76                    | -1.49 | 32.9% | 133  | -2.87                    | 29.3% |      | 3    | -5.80                    |       |      |      |
|                | S&hA   | 16                    | -2.15 | 50.0% | 55   | -4.55                    | 54.5% |      | 17   | -3.49                    | 29.4% |      |      |
|                | SE     | 211                   | -0.59 | 21.3% | 9    | -2.29                    | 44.4% |      |      |                          |       |      |      |
| maxHS_NDJFMAM  | NW     | 65                    | -1.05 | 13.8% |      |                          |       |      |      |                          |       |      |      |
|                | NE     | 21                    | -0.79 | 4.8%  |      |                          |       |      |      |                          |       |      |      |
|                | N&hA   | 76                    | -4.02 | 15.8% | 133  | -5.33                    | 23.3% |      | 3    | -8.27                    |       |      |      |
|                | S&hA   | 16                    | -9.03 | 68.8% | 55   | -11.56                   | 65.5% |      | 17   | -11.07                   | 41.2% |      |      |
|                | SE     | 211                   | -2.70 | 20.4% | 9    | -6.24                    | 44.4% |      |      |                          |       |      |      |

## Sensitivity to gap filling

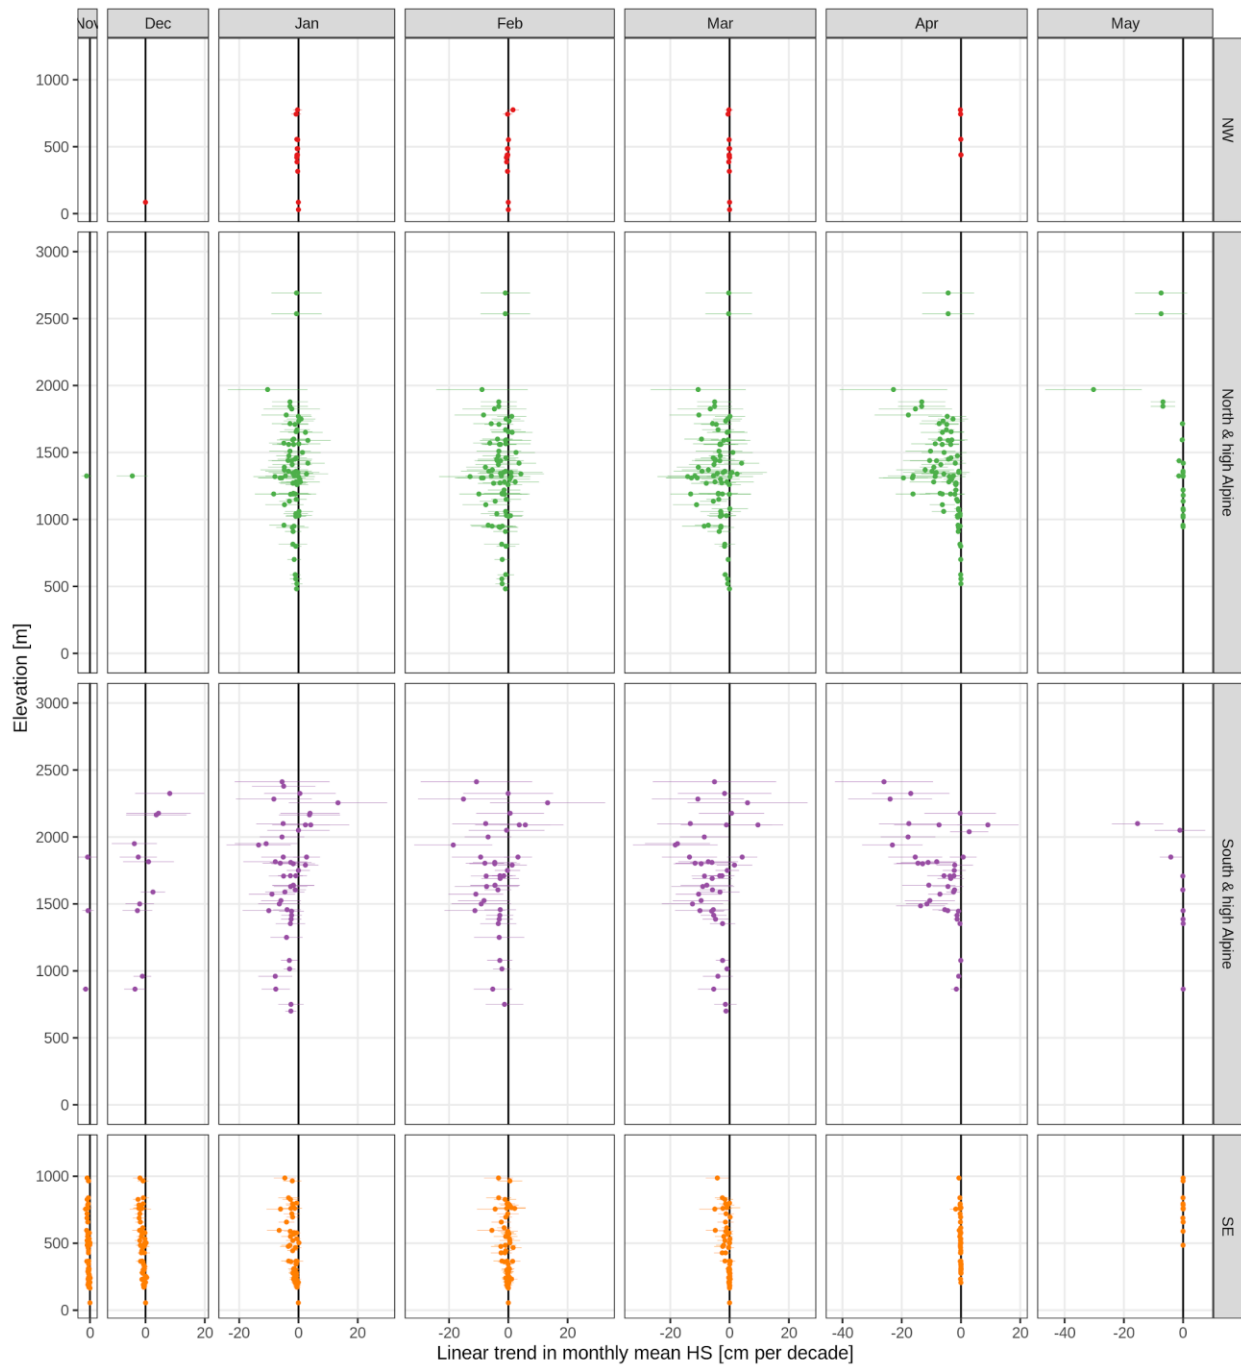

Figure S10: Same as Fig. 5 (monthly trends), but without gap filling.



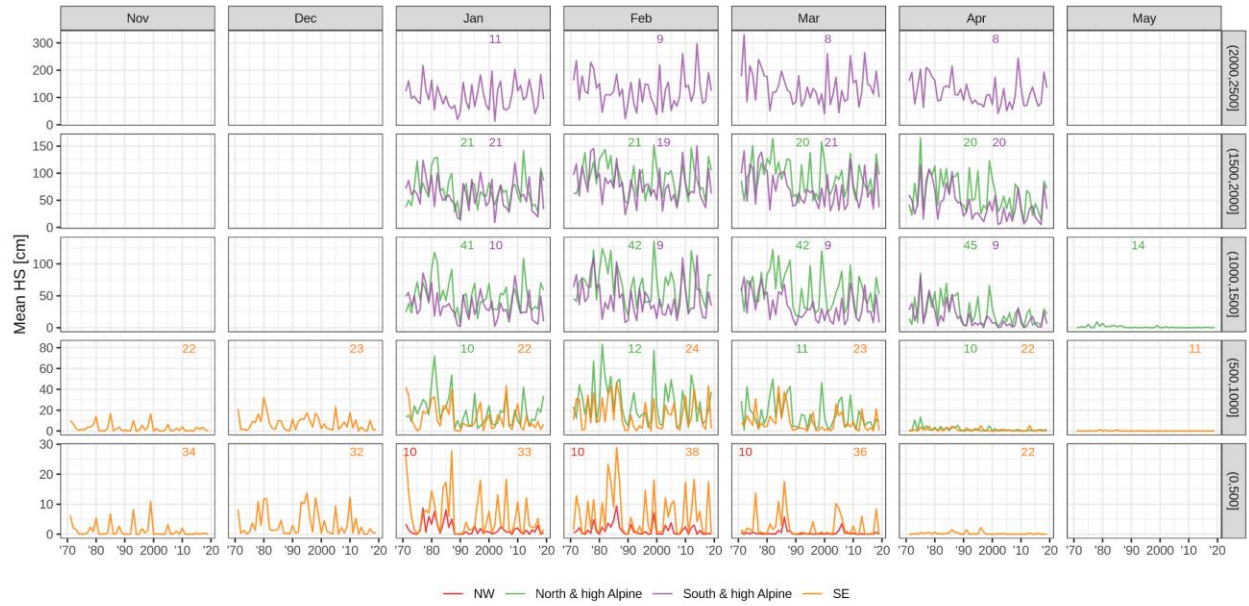

Figure S11: Same as Fig. 7 (monthly time series), but without gap filling.

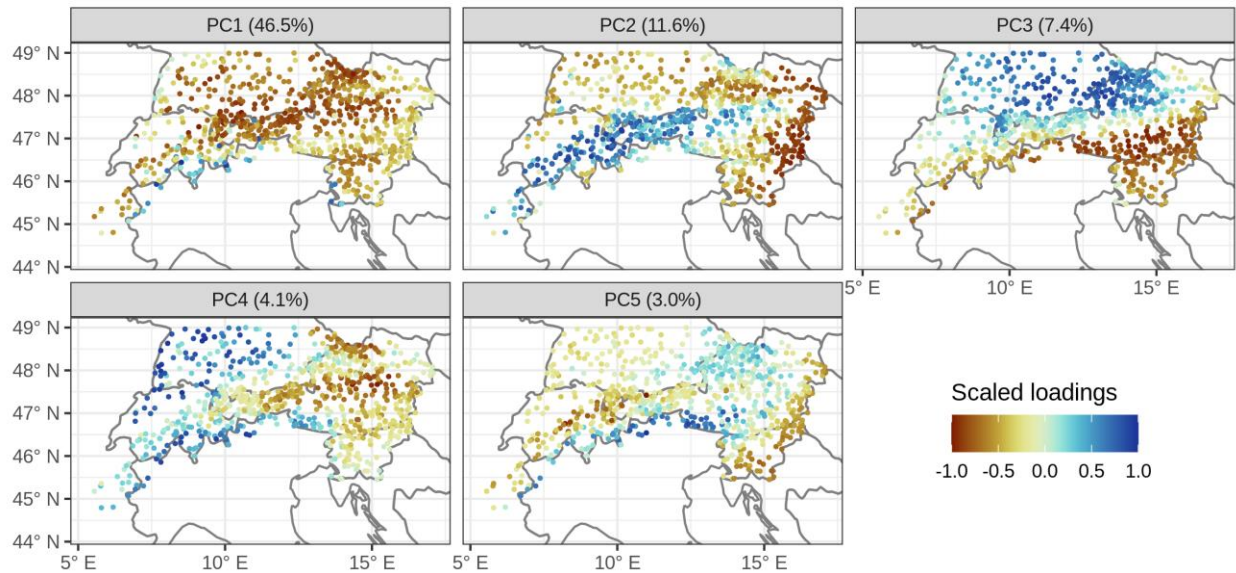

Figure S12: Same as Fig. S3 (PCA without NA), but without gap filling.

## Comparison of trend models (OLS, GLS, Theil-Sen, NB)

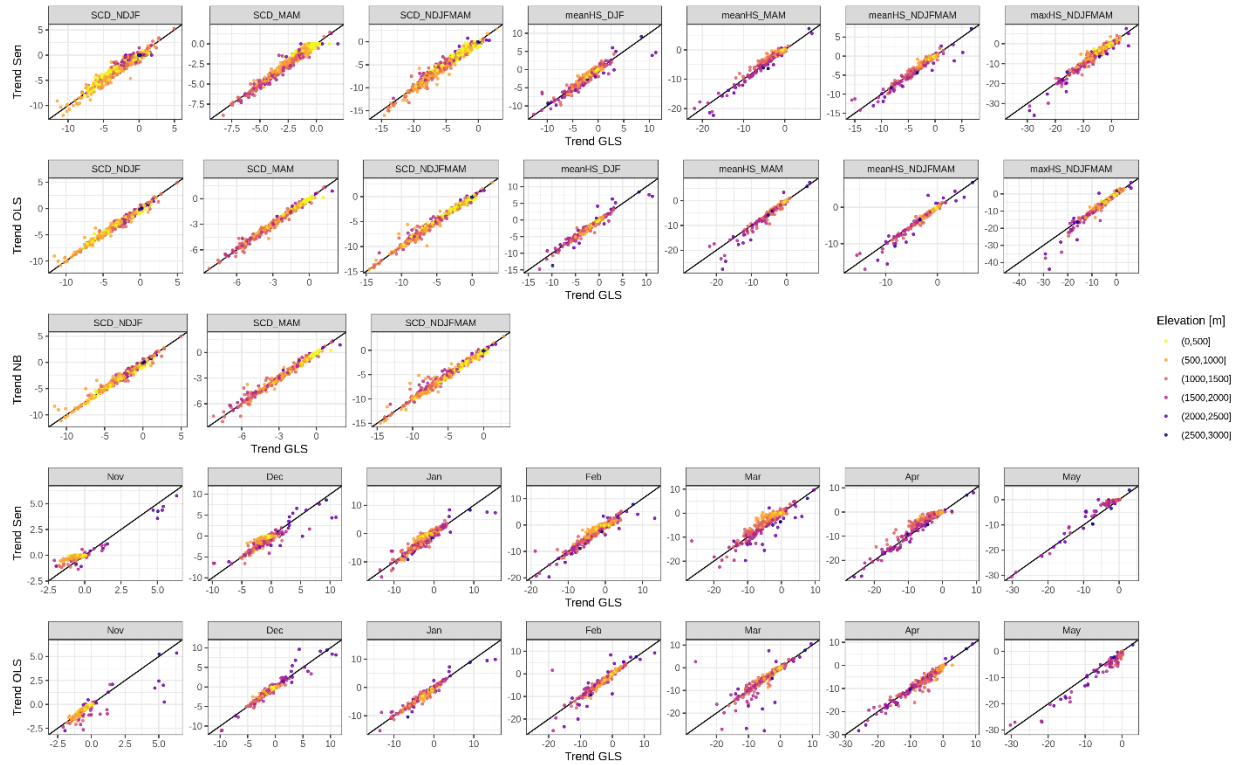

**Figure S13:** Scatterplots of trend estimates from various trend models for all seasonal (first 3 rows) and all monthly (last 2 rows) snow indices. The x-axes always show estimates of the GLS (generalized least squares) model, which includes a time coefficient for the residual variance. The y-axes show estimates from the Theil-Sen (Sen) trend estimator (robust non-parametric method), ordinary least squares (OLS; constant residual variance), and only for SCD indices a negative binomial model (NB; model for count data with overdispersion).

**Table S10: Summary metrics for trend model comparison. For model abbreviations see Figure S13. Bias is the average difference of decadal trends between models (M1 minus M2). MAE is the mean absolute error of decadal trends between M1 and M2. Correlation is the Pearson correlation coefficient of M1 and M2. The last 4 columns denote the agreement between significance estimates of M1 and M2, where significance was assumed if  $p < 0.05$ . Thus column “M1\_sig\_M2\_sig” shows percentages where M1 and M2 both indicate significant trends, column “M1\_sig\_M2\_ns” shows the percentage when M1 indicates a significant trend and M2 a non-significant one, etc. For the Theil-Sen trend estimator, the Mann-Kendall test was used to assess significance.**

| Model 1 (M1) | Model 2 (M2) | Variable       | Bias  | MAE  | Corr | M1_sig_M2_sig | M1_sig_M2_ns | M1_ns_M2_sig | M1_ns_M2_ns |
|--------------|--------------|----------------|-------|------|------|---------------|--------------|--------------|-------------|
| Sen          | GLS          | SCD_NDJF       | 0.11  | 0.46 | 0.96 | 21%           | 2%           | 10%          | 68%         |
| Sen          | GLS          | SCD_MAM        | 0.08  | 0.27 | 0.98 | 38%           | 7%           | 6%           | 49%         |
| Sen          | GLS          | SCD_NDJFMAM    | 0.04  | 0.50 | 0.98 | 46%           | 3%           | 5%           | 46%         |
| Sen          | GLS          | meanHS_DJF     | 0.09  | 0.43 | 0.95 | 12%           | 3%           | 5%           | 79%         |
| Sen          | GLS          | meanHS_MAM     | 0.25  | 0.44 | 0.98 | 22%           | 14%          | 6%           | 58%         |
| Sen          | GLS          | meanHS_NDJFMAM | 0.06  | 0.30 | 0.97 | 24%           | 5%           | 7%           | 63%         |
| Sen          | GLS          | maxHS_NDJFMAM  | 0.10  | 0.79 | 0.97 | 22%           | 2%           | 6%           | 70%         |
| OLS          | GLS          | SCD_NDJF       | 0.03  | 0.23 | 0.99 | 27%           | 2%           | 3%           | 68%         |
| OLS          | GLS          | SCD_MAM        | 0.01  | 0.12 | 0.99 | 42%           | 1%           | 2%           | 55%         |
| OLS          | GLS          | SCD_NDJFMAM    | 0.06  | 0.25 | 0.99 | 48%           | 1%           | 3%           | 48%         |
| OLS          | GLS          | meanHS_DJF     | -0.06 | 0.23 | 0.97 | 15%           | 2%           | 3%           | 80%         |
| OLS          | GLS          | meanHS_MAM     | -0.14 | 0.29 | 0.98 | 24%           | 2%           | 4%           | 70%         |
| OLS          | GLS          | meanHS_NDJFMAM | -0.06 | 0.19 | 0.98 | 27%           | 2%           | 5%           | 66%         |
| OLS          | GLS          | maxHS_NDJFMAM  | -0.15 | 0.51 | 0.97 | 23%           | 2%           | 4%           | 70%         |
| NB           | GLS          | SCD_NDJF       | -0.03 | 0.22 | 0.99 | 27%           | 2%           | 3%           | 68%         |
| NB           | GLS          | SCD_MAM        | -0.01 | 0.14 | 0.99 | 42%           | 1%           | 2%           | 55%         |
| NB           | GLS          | SCD_NDJFMAM    | -0.00 | 0.27 | 0.99 | 48%           | 1%           | 3%           | 48%         |
| Sen          | GLS          | Nov            | 0.36  | 0.43 | 0.94 | 15%           | 9%           | 29%          | 46%         |
| Sen          | GLS          | Dec            | 0.12  | 0.59 | 0.87 | 7%            | 5%           | 10%          | 79%         |
| Sen          | GLS          | Jan            | 0.39  | 0.73 | 0.93 | 10%           | 2%           | 8%           | 80%         |
| Sen          | GLS          | Feb            | 0.01  | 0.66 | 0.94 | 4%            | 2%           | 3%           | 91%         |
| Sen          | GLS          | Mar            | 0.45  | 0.96 | 0.91 | 13%           | 9%           | 5%           | 73%         |
| Sen          | GLS          | Apr            | 0.64  | 0.83 | 0.97 | 41%           | 16%          | 10%          | 33%         |
| Sen          | GLS          | May            | 0.32  | 0.41 | 0.98 | 15%           | 15%          | 5%           | 65%         |
| OLS          | GLS          | Nov            | -0.06 | 0.20 | 0.82 | 12%           | 1%           | 32%          | 55%         |
| OLS          | GLS          | Dec            | 0.07  | 0.30 | 0.96 | 6%            | 1%           | 11%          | 83%         |
| OLS          | GLS          | Jan            | -0.14 | 0.31 | 0.97 | 17%           | 5%           | 1%           | 77%         |
| OLS          | GLS          | Feb            | -0.07 | 0.39 | 0.93 | 5%            | 2%           | 2%           | 91%         |
| OLS          | GLS          | Mar            | -0.03 | 0.56 | 0.87 | 14%           | 2%           | 4%           | 80%         |
| OLS          | GLS          | Apr            | -0.34 | 0.56 | 0.98 | 40%           | 10%          | 11%          | 39%         |
| OLS          | GLS          | May            | -0.46 | 0.52 | 0.98 | 18%           | 12%          | 2%           | 67%         |
